# Supplementary material for: Functional Analysis of Two Affinity cAMP Phosphodiesterases in the Nematode-Trapping Fungus Arthrobotrys oligospora
Source: MDPI journal article supplement (doi:10.3390/pathogens11040405), 2022-03-26
Supplement: s1 [file s1]

## Supporting Information

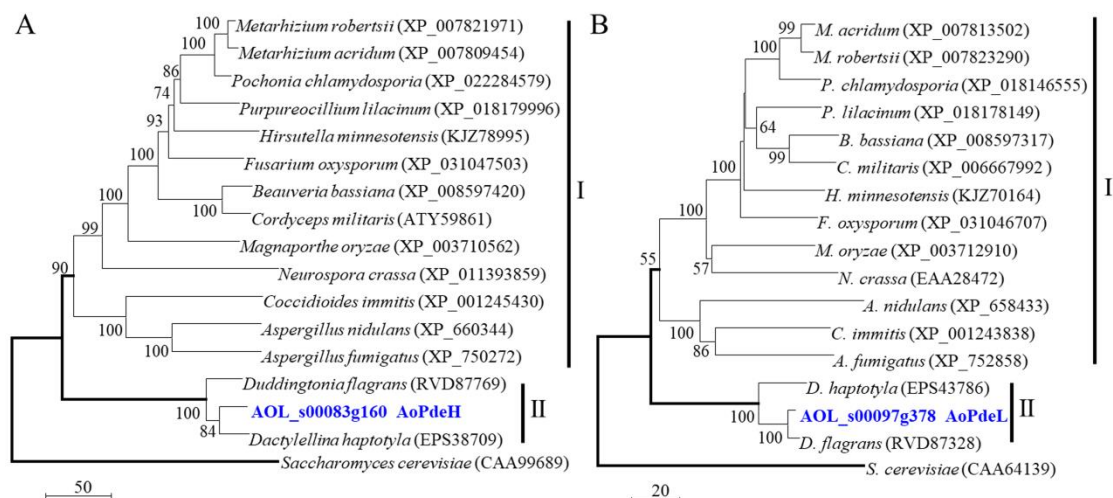

**Figure S1.** Phylogenetic tree analysis based on the amino acid sequences of PdeH and PdeL homologous proteins from different fungi. (A) Phylogenetic tree of PdeH orthologs from various fungi. (B) Phylogenetic tree of PdeL orthologs from various fungi. GenBank accession numbers are provided in brackets. The amino acid sequences of PdeH and PdeL proteins were aligned with ClustalX version 1.83, and MEGA 7 was used to construct a neighbor-joining tree, including bootstrap analysis with 1,000 replicates.

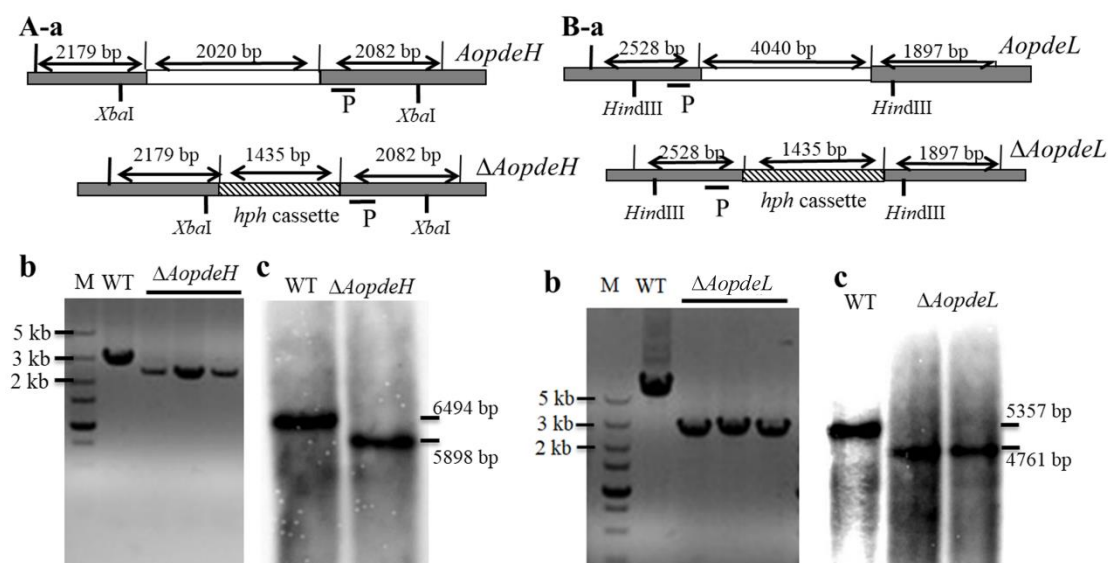

**Figure S2.** Deletion of *AopdeH* and *AopdeL* in *A. oligospora*. (A) Deletion of *AopdeH* and verification of transformants. (A-a) The diagrammatic sketch of homologous recombination of *AopdeH* and the homologous flanks of the target gene. (A-b) *AopdeH*-deleted transformants were confirmed by PCR amplification. M, DNA marker; WT, Wild-type strain;  $\Delta AopdeH$ , transformants. (A-c) Southern blotting analysis of wild-type (WT) and transformant ( $\Delta AopdeH$ ). (B) Deletion of *AopdeL* and verification of transformants. (B-a) The diagrammatic sketch of homologous recombination of *AopdeL* and the homologous flanks of the target gene. (B-b) *AopdeL*-deleted transformants were confirmed by PCR amplification. M, DNA marker; WT, Wild-type strain;  $\Delta AopdeL$ , transformants. (B-c) Southern blotting analysis of wild-type (WT) and transformants ( $\Delta AopdeL$ ).

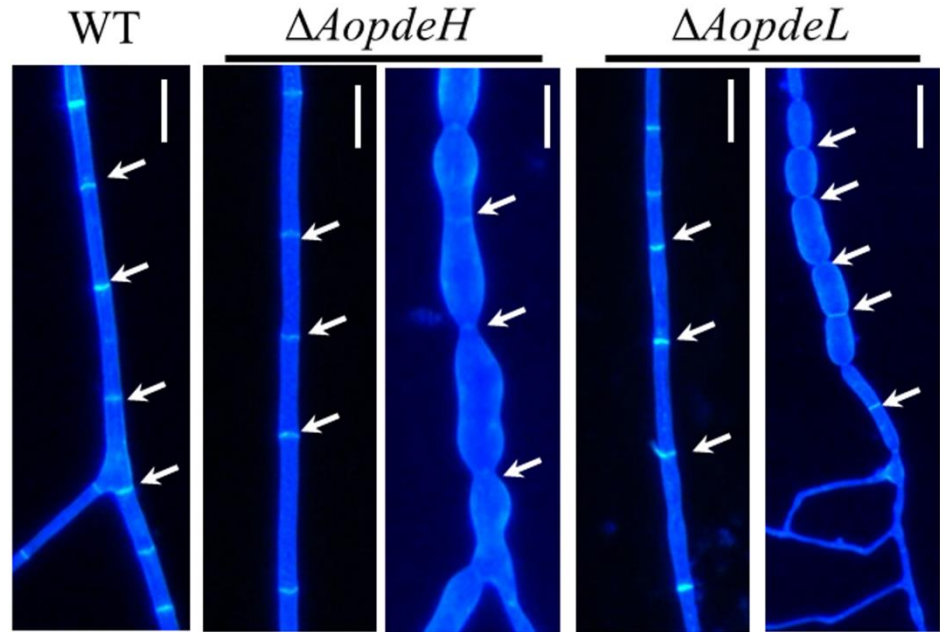

**Figure S3.** Comparison of the hyphal septum between WT and mutants. The hyphal septa of the WT and mutants were stained with 20  $\mu\text{g/mL}$  calcofluor white (CFW). Arrow, hyphal septum. Bar = 10  $\mu\text{m}$ .

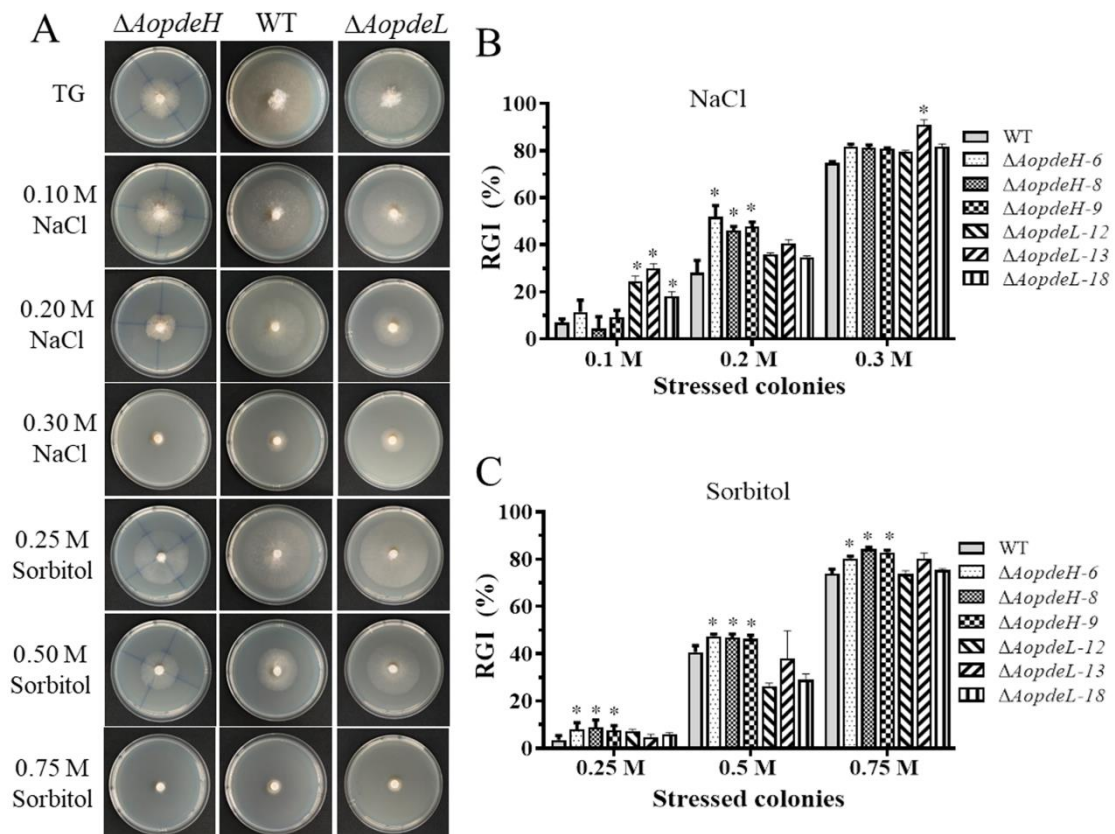

**Figure S4.** Comparison of osmotic stress responses between WT and mutants. (A) Colonial morphology of fungal strains under osmotic stress. (B) and (C) Relative growth inhibition (RGI) of fungal colonies after being grown for five days at 28  $^{\circ}\text{C}$  on TG plates supplemented with different concentrations of NaCl and sorbitol, respectively. An asterisk indicates a significant difference between mutant and the WT strain (Tukey's HSD,  $p < 0.05$ ).

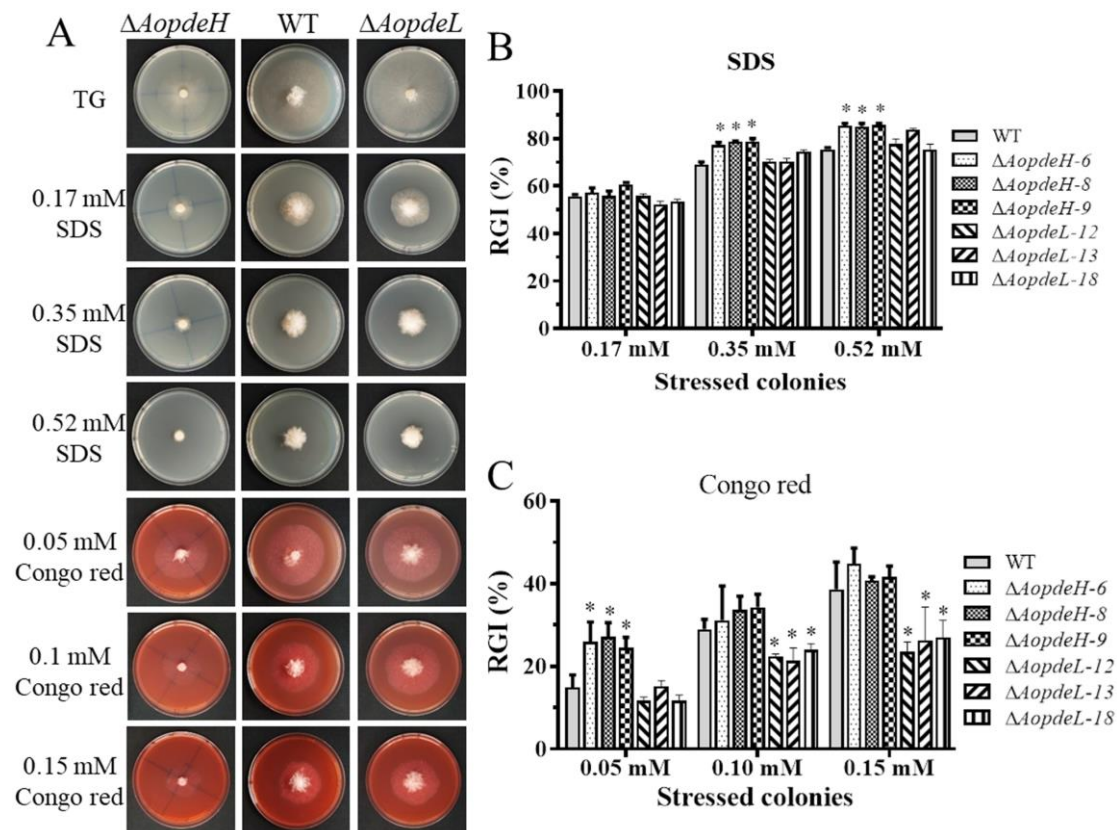

**Figure S5.** Comparison of cell wall stress agent responses between WT and mutants. (A) Colonial morphology of fungal strains under cell wall stress agents. (B) and (C) Relative growth inhibition (RGI) of fungal colonies after being grown for five days at 28 °C on TG plates supplemented with different concentrations of SDS and Congo red, respectively. An asterisk indicates a significant difference between mutant and the WT strain (Tukey's HSD,  $p < 0.05$ ).

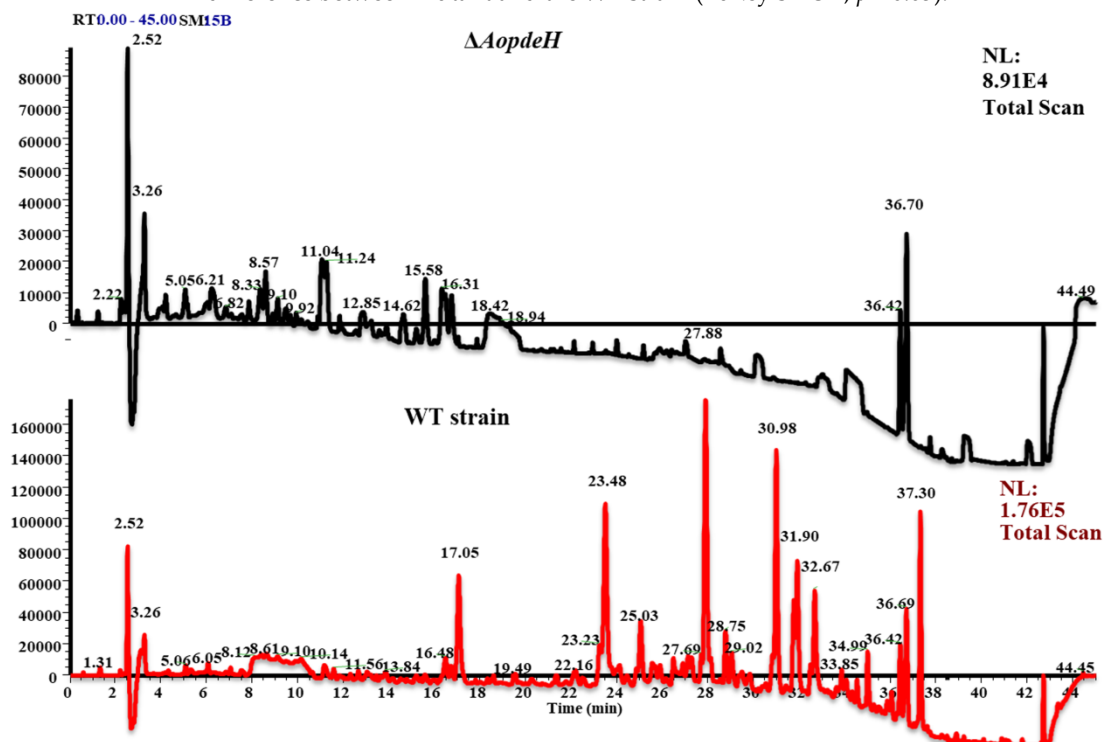

**Figure S6.** Comparison of high-performance liquid chromatography profiles of the WT and  $\Delta AopdeH$  mutant strains.

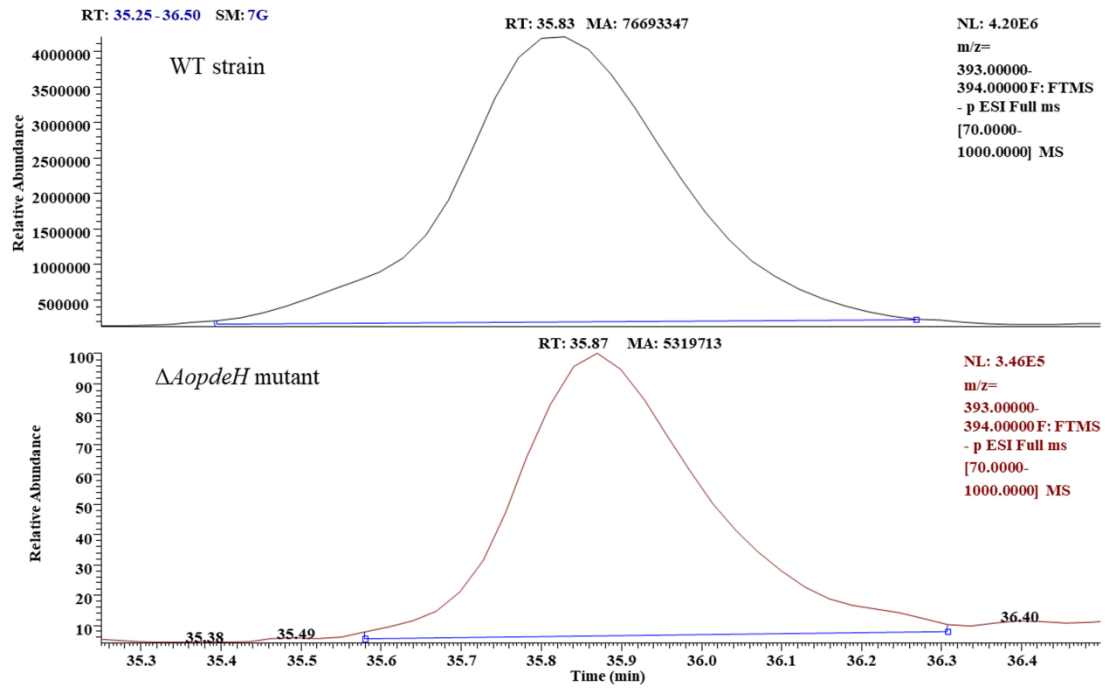

**Figure S7.** Comparison of the relative peak area of arthrobotrisins between WT and  $\Delta AopdeH$  mutant strains.

**Table S1.** The sequence similarity between AoPdeH/AoPdeL and orthologs from different fungi. The sequence similarity of orthologous PdeH/PdeL was analyzed using DNAMAN software.

| Species                          | Simialrity to AoPdeH (%) | Simialrity to AoPdeL (%) | Group                   |
|----------------------------------|--------------------------|--------------------------|-------------------------|
| <i>Arthrobotrys oligospora</i>   | 100                      | 100                      | NT fungi                |
| <i>Duddingtonia flagrans</i>     | 89.9                     | 93.3                     |                         |
| <i>Dactylellina haptotyla</i>    | 89.8                     | 72.7                     |                         |
| <i>Neurospora crassa</i>         | 31.7                     | 34.3                     | Other filamentous fungi |
| <i>Aspergillus nidulans</i>      | 31.5                     | 30.9                     |                         |
| <i>Aspergillus fumigatus</i>     | 32.8                     | 38.4                     |                         |
| <i>Purpureocillium lilacinum</i> | 34.8                     | 41.5                     |                         |
| <i>Hirsutella minnesotensis</i>  | 34.4                     | 43.1                     |                         |
| <i>Pochonia chlamydosporia</i>   | 34.8                     | 42.1                     |                         |
| <i>Metarhizium robertsii</i>     | 33.5                     | 43.2                     |                         |
| <i>Metarhizium acridum</i>       | 32.9                     | 42.7                     |                         |
| <i>Beauveria bassiana</i>        | 33.9                     | 41.7                     |                         |
| <i>Cordyceps militaris</i>       | 32.9                     | 39.5                     |                         |
| <i>Fusarium oxysporum</i>        | 34.6                     | 42.9                     |                         |
| <i>Magnaporthe oryzae</i>        | 34.8                     | 40.6                     |                         |
| <i>Coccidioides immitis</i>      | 32.2                     | 39.4                     |                         |
| <i>Saccharomyces cerevisiae</i>  | 19.0                     | 28.5                     | yeast                   |

**Table S2.** Comparison of the differential compounds-metabolic pathways between the WT and  $\Delta AopdeH$  mutant strains.

| Compounds-metabolic pathways | upregulated | downregulated |
|------------------------------|-------------|---------------|
|------------------------------|-------------|---------------|

|                                                                      |    |      |
|----------------------------------------------------------------------|----|------|
| Superpathway of aromatic compound degradation via 2-oxopent-4-enoate | 4  | 39   |
| Anaerobic aromatic compound degradation ( <i>Thauera aromatica</i> ) | 4  | 27   |
| Superpathway of aerobic toluene degradation                          | 2  | 28   |
| Superpathway of aromatic compound degradation via 3-oxoadipate       | 4  | 21   |
| Superpathway of chorismate metabolism                                | 4  | 15   |
| Toluene degradation IV (aerobic) (via catechol)                      | 2  | 23   |
| Naphthalene degradation to acetyl-CoA                                | 2  | 23   |
| Mandelate degradation to acetyl-CoA                                  | 2  | 14   |
| Toluene degradation III (aerobic) (via p-cresol)                     | 2  | 20   |
| Superpathway of aromatic amino acid biosynthesis                     | 4  | 10   |
| Superpathway of 4-hydroxybenzoate biosynthesis (yeast)               | 2  | 13   |
| L-tyrosine degradation IV (to 4-methylphenol)                        | 2  | 14   |
| Superpathway of scopolin and esculin biosynthesis                    | 2  | 10   |
| Benzoate biosynthesis I (CoA-dependent, ss-oxidative)                | 2  | 14   |
| Superpathway of rosmarinic acid biosynthesis                         | 2  | 10   |
| Meta cleavage pathway of aromatic compounds                          | 2  | 8    |
| Superpathway of L-lysine degradation                                 | 2  | 1    |
| Novobiocin biosynthesis                                              | 2  | 9    |
| Toluene degradation I (aerobic) (via o-cresol)                       | 0  | 12   |
| Other                                                                | 13 | 114  |
| Not set                                                              | 84 | 1715 |

**Table S3.** List of primers used for gene disruption in this study.

| Primers   | Sequence (5'-3')                                         | Description                             |
|-----------|----------------------------------------------------------|-----------------------------------------|
| 83g160-5F | GTAACGCCAGGGTTTTCCCAGTCACGACGG<br>AAATGGCTCCCGTGACTT-3   | Amplify the <i>AopdeH</i> gene 5' flank |
| 83g160-5R | ATCCACTTAACGTTACTGAAATCTCCAACCTC<br>AGGCTCAACAACACCGT-3  |                                         |
| 83g160-3F | CTCCTTCAATATCATCTTCTGTCTCCGACAG<br>TATCGCCTCTTCGTTGTCC-3 | Amplify the <i>AopdeH</i> gene 3' flank |
| 83g160-3R | GCGGATAACAATTTACACAGGAAACAGC<br>CCTATTACTGGACCCGCATT-3   |                                         |
| 97g378-5F | GTAACGCCAGGGTTTTCCCAGTCACGACGT<br>TCCCATCCTTATCGGTCTC-3  | Amplify the <i>AopdeL</i> gene 5' flank |
| 97g378-5R | ATCCACTTAACGTTACTGAAATCTCCAACA<br>TCCGTCGTTGTCCCCTTA-3   |                                         |
| 97g378-3F | CTCCTTCAATATCATCTTCTGTCTCCGACGG<br>GAGAAAAGGCGGGATTA-3   | Amplify the <i>AopdeL</i> gene 3' flank |
| 97g378-3R | GCGGATAACAATTTACACAGGAAACAGC<br>GGATAGCCGAGACTGACCCA-3   |                                         |
| hphF      | GTCGGAGACAGAAGATGATATTGAAGGAG<br>C                       | Amplify the <i>hph</i> cassette         |

|            |                                |                              |
|------------|--------------------------------|------------------------------|
| hphR       | GTTGGAGATTTTCAGTAACGTTAAGTGGAT |                              |
| 83g160-YZF | GTCAGGGCAACGGAGTGTAAG          | Verify the                   |
| 83g160-YZR | GGAATAGCATCATCGGTAGGA          | transformants for            |
|            |                                | <i>AopdeH</i> gene           |
| 97g378-YZF | GCTTGCTGATAATCTTTCCTCG         | Verify the                   |
| 97g378-YZR | GAACCAACAACCTCCGCATAACT        | transformants for            |
|            |                                | <i>AopdeL</i> gene           |
| 83g160-TZF | GTCAGGGCAACGGAGTGTAAG          | Make Southern blotting       |
| 83g160-TZR | GACGCACAGTAACGACAACCATA        | probe for <i>AopdeH</i> gene |
| 97g378-TZF | GAGTTATGCGGAGTTGTTGGT          | Make Southern blotting       |
| 97g378-TZR | ACTGGAGGGTTGCTAGAAAGA          | probe for <i>AopdeL</i> gene |

**Table S4.** List of RT-PCR primers used in this study.

| Sporulation-related genes      | Sequence (5'-3')                                             |
|--------------------------------|--------------------------------------------------------------|
| AOL_s00007g157 ( <i>flbC</i> ) | 157-5F-CTCTCCGGCAAAGACAATCG<br>157-3R-GTCGACTGAGGATAGTAGCT   |
| AOL_s00043g361 ( <i>fluG</i> ) | 361-5F-GATTCCAGTCCCGTGAATTC<br>361-3R-GCTAAGGAGAGGATGGGCAT   |
| AOL_s00054g700 ( <i>vosA</i> ) | 700-5F- CAAACCACCCACCACCAAAT<br>700-3R-GGATGGACAGGAGAAGGACC  |
| AOL_s00054g811 ( <i>velB</i> ) | 811-5F- ATTCCGCAACTTCTCCCTCA<br>811-3R- GGCATGTTTGGATTCTGGGG |
| AOL_s00080g63 ( <i>abaA</i> )  | 63-5F-AACTTTATGCGCCTTGTCGT<br>63-3R-TTGGCTAGGTGGTCTGTACG     |
| AOL_s00083g487 ( <i>lreA</i> ) | 487-5F-CCCTCCATACAGTCAGTGCTA<br>487-3R-CCCTACCCACCAAGATGATAC |
| AOL_s00080g93 ( <i>lreB</i> )  | 93-5F-CGAAGAGCAAGAAGAACAAGC<br>93-3R-AGATGGGTATGGGATAGAGGG   |
| AOL_s00215g893 ( <i>aspB</i> ) | 893-5F-ATACCGCCAACACCCTCTAC<br>893-3R-AACCATCTTCATCTCGGCCT   |
| $\beta$ -tubulin gene          | tub-5F-CCACCTTCGTCGGTAACTC                                   |
| AOL_s00076g640 ( <i>tub</i> )  | tub-3R-TCGTCCATACCCTCACCAG                                   |
